# Supplementary material for: Long-term effects of functional appliances in treated versus untreated patients with Class II malocclusion: A systematic review and meta-analysis
Source: PLOS journal article supplement (doi:10.1371/journal.pone.0221624), 2019-09-06
Supplement: S2 (10.1371/journal.pone.0221624.s002) [file journal.pone.0221624.s002]

**S2 Table. Name of the search source, date range, search platform/provider and link of all databases that were used.**

| Database                                                                                  | Search platform or provider;<br>date range                                                                                 | Link                                                                                                                                                                                                                                |
|-------------------------------------------------------------------------------------------|----------------------------------------------------------------------------------------------------------------------------|-------------------------------------------------------------------------------------------------------------------------------------------------------------------------------------------------------------------------------------|
| <b>Bibliographic databases</b>                                                            |                                                                                                                            |                                                                                                                                                                                                                                     |
| <b>MEDLINE, EMBASE, CENTRAL</b>                                                           |                                                                                                                            |                                                                                                                                                                                                                                     |
| MEDLINE                                                                                   | Pubmed; 1946 - 13 <sup>th</sup> March 2018                                                                                 | <a href="https://www.ncbi.nlm.nih.gov/pubmed/advanced">https://www.ncbi.nlm.nih.gov/pubmed/advanced</a>                                                                                                                             |
| EMBASE                                                                                    | OVID; 1974 - 15 <sup>th</sup> March 2018                                                                                   | <a href="https://www.embase.com/search/advanced">https://www.embase.com/search/advanced</a>                                                                                                                                         |
| Cochrane Central Register of Controlled Trials (CENTRAL)                                  | Cochrane Library; 1993 - 13 <sup>th</sup> March 2018                                                                       | <a href="http://onlinelibrary.wiley.com/cochranelibrary/search/">http://onlinelibrary.wiley.com/cochranelibrary/search/</a>                                                                                                         |
| <b>National and regional databases</b>                                                    |                                                                                                                            |                                                                                                                                                                                                                                     |
| Latin America and the Caribbean (LILACS)                                                  | Biblioteca Regional de Medicina (BIREME), Pan American Health Organization (PAHO), WHO; 1982 - 13 <sup>th</sup> March 2018 | <a href="http://pesquisa.bvsalud.org/portal/advanced/?lang=en">http://pesquisa.bvsalud.org/portal/advanced/?lang=en</a>                                                                                                             |
| <b>General search engines</b>                                                             |                                                                                                                            |                                                                                                                                                                                                                                     |
| Google Scholar                                                                            | 2004 - 14 <sup>th</sup> March 2018                                                                                         | <a href="https://scholar.google.it/">https://scholar.google.it/</a>                                                                                                                                                                 |
| Turning Research into Practice (TRIP) database                                            | 1997 - 14 <sup>th</sup> March 2018                                                                                         | <a href="https://www.tripdatabase.com/">https://www.tripdatabase.com/</a>                                                                                                                                                           |
| <b>Citation indexes</b>                                                                   |                                                                                                                            |                                                                                                                                                                                                                                     |
| Web of Science Core Collection - Science Citation Index / Science Citation Index Expanded | Web of Science; 1945 - 15 <sup>th</sup> March 2018                                                                         | <a href="https://apps.webofknowledge.com/WOS_GeneralSearch_input.do?product=WOS&amp;search_mode=GeneralSearch">https://apps.webofknowledge.com/WOS_GeneralSearch_input.do?product=WOS&amp;search_mode=GeneralSearch</a>             |
| Scopus                                                                                    | Elsevier; 2004 - 13 <sup>th</sup> March 2018                                                                               | <a href="https://www.scopus.com/">https://www.scopus.com/</a>                                                                                                                                                                       |
| <b>Dissertation and theses databases</b>                                                  |                                                                                                                            |                                                                                                                                                                                                                                     |
| ProQuest Dissertations & Theses Global                                                    | 1938 - 15 <sup>th</sup> March 2018                                                                                         | <a href="https://search.proquest.com/pqdtglobal/advanced">https://search.proquest.com/pqdtglobal/advanced</a>                                                                                                                       |
| ProQuest Dissertations and Theses – UK & Ireland                                          | 1950 - 15 <sup>th</sup> March 2018                                                                                         | <a href="https://search.proquest.com/pqdtuk/advanced">https://search.proquest.com/pqdtuk/advanced</a>                                                                                                                               |
| <b>Grey literature databases</b>                                                          |                                                                                                                            |                                                                                                                                                                                                                                     |
| OpenGrey, formerly System for Information on Grey Literature (SIGLE)                      | 1993 - 13 <sup>th</sup> March 2018                                                                                         | <a href="http://www.opengrey.eu/">http://www.opengrey.eu/</a>                                                                                                                                                                       |
| <b>Journals and other non-bibliographic database sources</b>                              |                                                                                                                            |                                                                                                                                                                                                                                     |
| <b>Hand-searching</b>                                                                     |                                                                                                                            |                                                                                                                                                                                                                                     |
| American Journal of Orthodontics and Dentofacial Orthopaedics                             | 1915 - 16 <sup>th</sup> March 2018                                                                                         | <a href="https://www.ajodo.org/">https://www.ajodo.org/</a>                                                                                                                                                                         |
| Angle Orthodontist                                                                        | 1931 - 16 <sup>th</sup> March 2018                                                                                         | <a href="https://www.angle.org/">https://www.angle.org/</a>                                                                                                                                                                         |
| Australian Journal of Orthodontics                                                        | 2010 - 16 <sup>th</sup> March 2018                                                                                         | <a href="https://www.aso.org.au/australasian-orthodontic-journal">https://www.aso.org.au/australasian-orthodontic-journal</a>                                                                                                       |
| European Journal of Orthodontics                                                          | 1979 - 16 <sup>th</sup> March 2018                                                                                         | <a href="https://academic.oup.com/ejo">https://academic.oup.com/ejo</a>                                                                                                                                                             |
| Journal of Clinical Orthodontics                                                          | 1967 - 16 <sup>th</sup> March 2018                                                                                         | <a href="https://www.jco-online.com/">https://www.jco-online.com/</a>                                                                                                                                                               |
| Journal of Orthodontics                                                                   | 1973 - 16 <sup>th</sup> March 2018                                                                                         | <a href="https://www.tandfonline.com/loi/yjor20">https://www.tandfonline.com/loi/yjor20</a>                                                                                                                                         |
| Orthodontics & Craniofacial Research                                                      | 1998 - 16 <sup>th</sup> March 2018                                                                                         | <a href="https://onlinelibrary.wiley.com/journal/16016343">https://onlinelibrary.wiley.com/journal/16016343</a>                                                                                                                     |
| Progress in Orthodontics                                                                  | 2013 - 16 <sup>th</sup> March 2018                                                                                         | <a href="https://progressinorthodontics.springeropen.com/">https://progressinorthodontics.springeropen.com/</a>                                                                                                                     |
| Seminars in Orthodontics                                                                  | 1995 - 16 <sup>th</sup> March 2018                                                                                         | <a href="https://www.semortho.com/">https://www.semortho.com/</a>                                                                                                                                                                   |
| <b>Tables of contents</b>                                                                 |                                                                                                                            |                                                                                                                                                                                                                                     |
| British Library Direct                                                                    | 1930 - 16 <sup>th</sup> March 2018                                                                                         | <a href="https://ondemand.bl.uk/onDemand/home">https://ondemand.bl.uk/onDemand/home</a>                                                                                                                                             |
| Current Contents Connect – Clinical Medicine                                              | Web of Science; 1998 - 15 <sup>th</sup> March 2018                                                                         | <a href="https://apps.webofknowledge.com/CCC_GeneralSearch_input.do?product=CCC&amp;search_mode=GeneralSearch">https://apps.webofknowledge.com/CCC_GeneralSearch_input.do?product=CCC&amp;search_mode=GeneralSearch</a>             |
| Scientific Electronic Library Online (SciELO) Citation Index                              | Web of Science; 1997 - 15 <sup>th</sup> March 2018                                                                         | <a href="https://apps.webofknowledge.com/SCIELO_GeneralSearch_input.do?product=SCIELO&amp;search_mode=GeneralSearch">https://apps.webofknowledge.com/SCIELO_GeneralSearch_input.do?product=SCIELO&amp;search_mode=GeneralSearch</a> |

**S2 Table (continued). Name of the search source, date range, search platform/provider and link of all databases that were used.**

| Database                                                                                                    | Search platform or provider;<br>date range              | Link                                                                                                                                                                                                                    |
|-------------------------------------------------------------------------------------------------------------|---------------------------------------------------------|-------------------------------------------------------------------------------------------------------------------------------------------------------------------------------------------------------------------------|
| <b>Conference abstracts or proceedings</b>                                                                  |                                                         |                                                                                                                                                                                                                         |
| BIOSIS Citation Index                                                                                       | Web of Science; 1969 - 15 <sup>th</sup><br>March 2018   | <a href="https://apps.webofknowledge.com/BCI_GeneralSearch_input.do?product=BCI&amp;search_mode=GeneralSearch">https://apps.webofknowledge.com/BCI_GeneralSearch_input.do?product=BCI&amp;search_mode=GeneralSearch</a> |
| Web of Science Core Collection –<br>Conference Proceedings Citation<br>Index – Science                      | Web of Science; 1990 - 15 <sup>th</sup><br>March 2018   | <a href="https://apps.webofknowledge.com/WOS_GeneralSearch_input.do?product=WOS&amp;search_mode=GeneralSearch">https://apps.webofknowledge.com/WOS_GeneralSearch_input.do?product=WOS&amp;search_mode=GeneralSearch</a> |
| ISI Proceedings                                                                                             | 2004 - 16 <sup>th</sup> March 2018                      | <a href="http://www.proceedings.com/">http://www.proceedings.com/</a>                                                                                                                                                   |
| <b>Other reviews, guidelines and reference lists as sources of studies</b>                                  |                                                         |                                                                                                                                                                                                                         |
| Cochrane Database of Systematic<br>Reviews (CDSR)                                                           | Cochrane Library; 1993 - 13 <sup>th</sup><br>March 2018 | <a href="http://onlinelibrary.wiley.com/cochranelibrary/search/">http://onlinelibrary.wiley.com/cochranelibrary/search/</a>                                                                                             |
| Database of Abstracts of Reviews<br>of Effects (DARE)                                                       | Cochrane Library; 1993 - 13 <sup>th</sup><br>March 2018 | <a href="http://onlinelibrary.wiley.com/cochranelibrary/search/">http://onlinelibrary.wiley.com/cochranelibrary/search/</a>                                                                                             |
| Health Technology Assessment<br>Database (HTA Database)                                                     | Cochrane Library; 1993 - 13 <sup>th</sup><br>March 2018 | <a href="http://onlinelibrary.wiley.com/cochranelibrary/search/">http://onlinelibrary.wiley.com/cochranelibrary/search/</a>                                                                                             |
| NHS Economic Evaluation<br>Database (NHS EED)                                                               | Cochrane Library; 1993 - 13 <sup>th</sup><br>March 2018 | <a href="http://onlinelibrary.wiley.com/cochranelibrary/search/">http://onlinelibrary.wiley.com/cochranelibrary/search/</a>                                                                                             |
| <b>Unpublished and ongoing studies</b>                                                                      |                                                         |                                                                                                                                                                                                                         |
| ClinicalTrials.gov register                                                                                 | From inception - 16 <sup>th</sup> March 2018            | <a href="https://clinicaltrials.gov/">https://clinicaltrials.gov/</a>                                                                                                                                                   |
| Current controlled trials<br>metaRegister of Controlled Trials<br>(mRCT) – active and archived<br>registers | From inception - 16 <sup>th</sup> March 2018            | <a href="https://www.controlled-trials.com/mrct/">https://www.controlled-trials.com/mrct/</a>                                                                                                                           |
| International prospective register<br>of systematic reviews<br>(PROSPERO)                                   | From inception - 16 <sup>th</sup> March 2018            | <a href="https://www.crd.york.ac.uk/prospero/#searchadvanced">https://www.crd.york.ac.uk/prospero/#searchadvanced</a>                                                                                                   |
